# Supplementary material for: Confining single Pt atoms from Pt clusters on multi-armed CdS for enhanced photocatalytic hydrogen evolution
Source: Royal Society of Chemistry journal article supplement (doi:10.1039/d2ta00198e), 2022-01-01
Supplement: d2ta00198e1.pdf [file d2ta00198e1.pdf]

## Supporting Information

# Confining Single Pt Atom from Pt Clusters on Multi-Armed CdS for Enhanced Photocatalytic Hydrogen Evolution

Xiangyu Lu,<sup>a,#</sup> Aomei Tong,<sup>b,#</sup> Dian Luo,<sup>a,#</sup> Fan Jiang,<sup>a</sup> Jieding Wei,<sup>a</sup> Yucheng Huang,<sup>a,\*</sup> Zheng Jiang,<sup>c</sup> Zhou Lu<sup>b,\*</sup> and Yonghong Ni<sup>a,\*</sup>

<sup>#</sup> Equal contribution for this work.

<sup>a</sup> College of Chemistry and Materials Science, Key Laboratory of Functional Molecular Solids, Ministry of Education, Anhui Laboratory of Molecule-Based Materials, Anhui Normal University, 189 Jiu Hua Southern Road, Wuhu, 241002, P.R. China. Email: [huangyc@mail.ahnu.edu.cn](mailto:huangyc@mail.ahnu.edu.cn) (Y.C. Huang); [niyh@mail.ahnu.edu.cn](mailto:niyh@mail.ahnu.edu.cn) (Y.H. Ni)

<sup>b</sup> School of Physics and Electronic Information, Anhui Normal University, 189 Jiu Hua Southern Road, Wuhu, 241002, P.R. China. Email: [zhoulu@mail.ahnu.edu.cn](mailto:zhoulu@mail.ahnu.edu.cn) (Z. Lu)

<sup>c</sup> Shanghai Synchrotron Radiation Facility, Zhangjiang Lab, Shanghai Advanced Research Institute, Chinese Academy of Science, Shanghai, P. R. China

### Experimental section

**Reagents.** chloroplatinic acid, L-reduced glutathione, sodium tetrahydridoborate were purchased from Sinopharm Chemical Reagent Co., Ltd. (Shanghai, China). CdCl<sub>2</sub>·2.5H<sub>2</sub>O, thiourea, dodecylthiol and ethylenediamine (EDA) were brought from Macklin. Deionized (DI) water with a resistivity of 18.25 MΩ·cm was used in all experiments. All the reagents in this experiment were analytical grade and used as received without further purification.

**Synthesis of Pt<sub>5</sub>(GS)<sub>10</sub> clusters.** Pt<sub>5</sub>(GS)<sub>10</sub> clusters were synthesized according to a reported method with some modifications.<sup>1</sup> In a typical synthesis, H<sub>2</sub>PtCl<sub>6</sub>·6H<sub>2</sub>O (0.20 mmol) and L-reduced glutathione (GSH) (0.75 mmol) were dissolved in 6 mL of H<sub>2</sub>O and stirred for 2 h at 0 °C; Then, 2.0 mL of the freshly prepared ice cold NaBH<sub>4</sub> (1.5 mmol) aqueous solution was added under vigorous stirring. After five hours, excess methanol was added to the solution, and the obtained yellow precipitate was collected by centrifugation and washed repeatedly with methanol, finally dried at 60 °C under vacuum overnight.

**Synthesis of multi-armed CdS nanorods.** Multi-armed CdS nanorods were prepared according to the literature with some modifications.<sup>2</sup> Typically, CdCl<sub>2</sub>·2.5H<sub>2</sub>O (0.074g, 0.4mmol), thiourea (0.051g,0.67mmol), dodecylthiol (8 g) and EDA (3 g) were put into a Teflon-lined stainless-steel autoclave with a volume of 25 mL. The autoclave was then filled with toluene up to 70% of its volume and maintained at 160 °C for 40 h. After cooling to room temperature naturally, the product was collected by centrifugation, washed with toluene and anhydrous ethanol several times, followed by drying at 60 °C in vacuum oven for 24 h. The powder was obtained for further use and characterization.

**Synthesis of Pt<sub>5</sub>/CdS.** Typically, a calculated amount of Pt<sub>5</sub>(GS)<sub>10</sub> clusters was dissolved in 2.0 mL of distilled water, and then added dropwise to a suspension containing 20 mg CdS nanorods. After

stirring at room temperature for 3 h, Pt<sub>5</sub>(GS)<sub>10</sub>/CdS composites were collected by evaporating solvent under vacuum, and dried overnight at 60 °C. Finally, the obtained powder was calcined in Ar atmosphere at a heating rate of 5 °C/min and maintained at 300 °C for 1 h. After cooling to room temperature naturally, the Pt<sub>5</sub>/CdS catalyst was obtained.

**Characterizations.** The phases and chemical compositions of the samples were analyzed on a Bruker D8 X-Ray Diffractometer with Cu K $\alpha$  radiation ( $\lambda = 1.5406 \text{ \AA}$ ). Transmission electron microscopy (TEM) images of the products were taken on a Hitachi HT7700 transmission electron microscope at an acceleration voltage of 120 kV, using the carbon-coated copper grid. The lattice fringe and fast Fourier transform (FFT) image were obtained by high resolution transmission (HRTEM) in Tecnai G2 (Thermo Fisher Scientific). The high-angle annular dark-field scanning transmission electron microscopy (HAADF-STEM) images and STEM-EDX elemental mappings were collected on FEI Talos F200X (Thermo Fisher Scientific). The valence state of the element was detected by X-ray photoelectron spectroscopy, which were carried out on an ESCALAB 250Xi instrument with a monochromatic Al K $\alpha$  ( $h\nu = 1486.6 \text{ eV}$ ) with the X-ray beam spot of 500  $\mu\text{m}$  and the transmittance of 30 eV. The FT-IR spectrum was recorded from KBr pellets in the range of 4000–400  $\text{cm}^{-1}$  on a Prestige-21 SHIMADZU FT-IR spectrometer. Steady state fluorescence spectra were conducted on FLSP 920 (Edinburgh Instruments, UK). All electrochemical measurements were performed on a CHI660E electrochemical station (Chenhua, Shanghai). Electrochemical impedance spectroscopy (EIS) was conducted at the open circuit potential over the frequency range from  $10^{-2}$  to  $10^5$  Hz with AC signals of amplitude of 5 mV. The measurements were carried out in a three-electrode system with the graphite rod as the counter electrode and an Ag/AgCl as the reference electrode at room temperature in 0.5 M Na<sub>2</sub>SO<sub>4</sub> solution. The working electrodes were prepared as follows: 2 mg of catalysts were firstly dispersed into a mixed solvent of 2 mL ethanol and 10  $\mu\text{L}$  Nafion under the ultrasound assistance; and then, the formed slurry was coated on Ni foam with the size of  $1 \times 1 \text{ cm}^2$ . The photocurrent measurements were performed on electrochemical station (CHI660E, Shanghai Chenhua Limited, China) with simulated solar light irradiation. Here, the indium tin oxide (ITO) glass was used as the substrate for preparing the working electrode. The photocurrent signals of the samples were measured under chopped light. The measurements were also carried out on a conventional three-electrode cell in 0.5 M Na<sub>2</sub>SO<sub>4</sub> solution. The XAFS Spectroscopy measurements were performed at the beamline BL14W1 of Shanghai Synchrotron Radiation Facility (SSRF). The electron beam energy of the storage ring was 3.5 GeV with a maximum stored current of 300 mA.

**Ultrafast transient absorption (TA) spectroscopy characterizations.** The femtosecond transient absorption (TA) spectra were acquired with a typical transmission pump-probe (UV/vis pump-broadband supercontinuum probe) instrument. A Ti:sapphire regenerative amplifier (Spitfire Ace, Spectra Physics, Inc.) produced laser pulses (6 mJ, 1 kHz) with a pulse width of 80 fs and center wavelength at 800 nm. The laser output was then split into several beams, one of which was used to generate wavelength-tunable light serving as the pump laser for TAS via a downstream optical parametric amplifier (TOPAS-Prime). In current work, 400 nm was chosen as the center wavelength of the TOPAS-Prime output. The pump laser was attenuated to 160 nJ and chopped with a 500 Hz mechanical chopper. Another laser beam propagated through an optical delay line (0-8 ns) and was then focused into a CaF<sub>2</sub> crystal to produce white light continuum, which serves as the probe light in the fs-TA. The pump and probe light overlap in the sample cell with an optical path of 2 mm. All experiments were conducted at room temperature. The CdS NRs and Pt<sub>5</sub>/CdS heterostructures were

both dispersed in ethylene glycol (0.22 mg/mL).

**Computational methods.** All the calculations were based on density functional theory (DFT) and implemented in the Vienna ab initio simulation package (VASP).<sup>3</sup> The ion-electron interactions were described with the projector-augmented wave (PAW) method.<sup>4</sup> Exchange-correlation potentials were expressed by the Perdew–Burke–Ernzerhof (PBE) form with the generalized gradient approximation (GGA).<sup>5</sup> An energy cutoff of 450 eV was used for the plane-wave basis set. The residual energy and force convergence criterion was set to  $10^{-5}$  eV and  $0.02$  eV  $\text{\AA}^{-1}$ , respectively. A vacuum space of  $20$   $\text{\AA}$  was applied to avoid interactions between two periodic units. In the geometry optimization and static self-consistent calculations, the k-point meshes of  $2 \times 2 \times 1$  generated by the Monkhorst-Pack Scheme were used.<sup>6</sup>

To calculate the hydrogen-adsorption Gibbs free energy ( $\Delta G_{H^*}$ ), an interfacial model was constructed where we put a Pt-S<sub>4</sub> on the supercell of  $4 \times 4 \times 1$  CdS (11-20) surface,  $4 \times 4 \times 2$  CdS (0001) surface and  $4 \times 4 \times 1.5$  CdS (10-10) surface. To cancel out the artificial electric field due to the net electric dipole moment that arises in polar surface calculations, a dipole correction was also used. According to the methodology developed by Nørskov et al.,<sup>7</sup> the chemical potential of  $H^+ + e^-$  is equal to that of  $1/2 H_2$  at standard condition ( $pH = 0$ ,  $P_{H_2} = 1$  bar,  $T = 298$  K).  $\Delta G_{H^*}$  was considered to characterize the hydrogen evolution reaction (HER) activity:

$$\Delta G_{H^*} = \Delta E_{H^*} + \Delta E - T\Delta S$$

Where  $\Delta E_{H^*}$  is the difference of hydrogen adsorption energy, which can be calculated using the formula of  $\Delta E_{H^*} = E_{T+H^*} - E_T - 1/2 E_{H_2}$ . Here  $E_{T+H^*}$ ,  $E_T$  and  $1/2 E_{H_2}$  represent the total energies of Pt<sub>5</sub>/CdS with one hydrogen atom adsorbed on the heterostructure, Pt<sub>5</sub>/CdS and H<sub>2</sub> molecule, respectively.  $\Delta E$  is the difference in zero-point energy (ZPE) between the adsorbed H\* and molecular H<sub>2</sub> in gas phase, which can be obtained via vibrational frequency calculations; T is the temperature (set as 298.15 K), and  $\Delta S$  is the difference in entropy. Due to the slight influence on the  $\Delta G_{H^*}$ , the solvation effect is not taken into account in this work.<sup>8</sup>

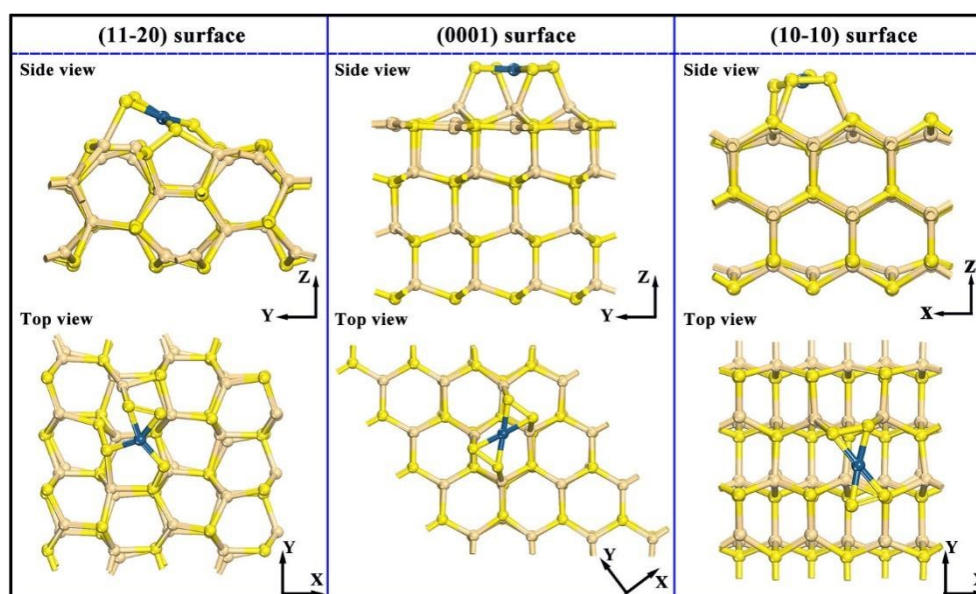

The supercells of  $4 \times 4 \times 1$  CdS (11-20),  $4 \times 4 \times 2$  CdS (0001) and  $4 \times 4 \times 1.5$  CdS (10-10) surfaces.

**Photocatalytic hydrogen production measurements.** The photocatalytic H<sub>2</sub> evolution experiments were performed in a 100 mL reaction cell connected to a gas-closed glass vacuum system. Typically, 5 mg of the photocatalyst was suspended in a mixed solvent containing 2 mL of triethanolamine (TEOA) and 8 mL of H<sub>2</sub>O. A 300 W Xe lamp with a 400 nm cutoff filter and full solar spectral band reflector was used as the light source. During the photocatalysis, the reaction system was vigorously stirred with a magnetic stirrer, and the reaction temperature was controlled at 6 °C by circulating cooling water. The amount of hydrogen produced from the photocatalytic reaction was sampled and quantified by gas chromatography with Ar as the carrier gas.

**References:**

1. X. K. Wan, H. B. Wu, B. Y. Guan, D.Y. Luan, X. W. Lou, *Adv. Mater.* **2019**, 1901349.
2. F. Gao, Q.Y. Lu, S.H. Xie, D.Y. Zhao, *Adv. Mater.* **2002**, *14*, 1537-1540.
3. G. Kresse, J. Furthmüller, *Phys. Rev. B.* **1996**, *54*, 11169.
4. P. E. Blöchl, *Phys. Rev. B.* **1994**, *50*, 17953.
5. J. P. Perdew, K. Burke, M. Ernzerhof, *Phys. Rev. Lett.* **1996**, *77*, 3865.
6. H. J. Monkhorst, J. D. Pack, *Phys. Rev. B.* **1976**, *13*, 5188–5192.
7. K. Mathew, R. Sundararaman, K. Letchworth-Weaver, T. A. Arias, R. G. Hennig, *J. Chem. Phys.* **2014**, *140*, 084106.
8. Y. Ping, G. Galli, *The J. Phys. Chem. C.* **2014**, *118*, 6019-6028.

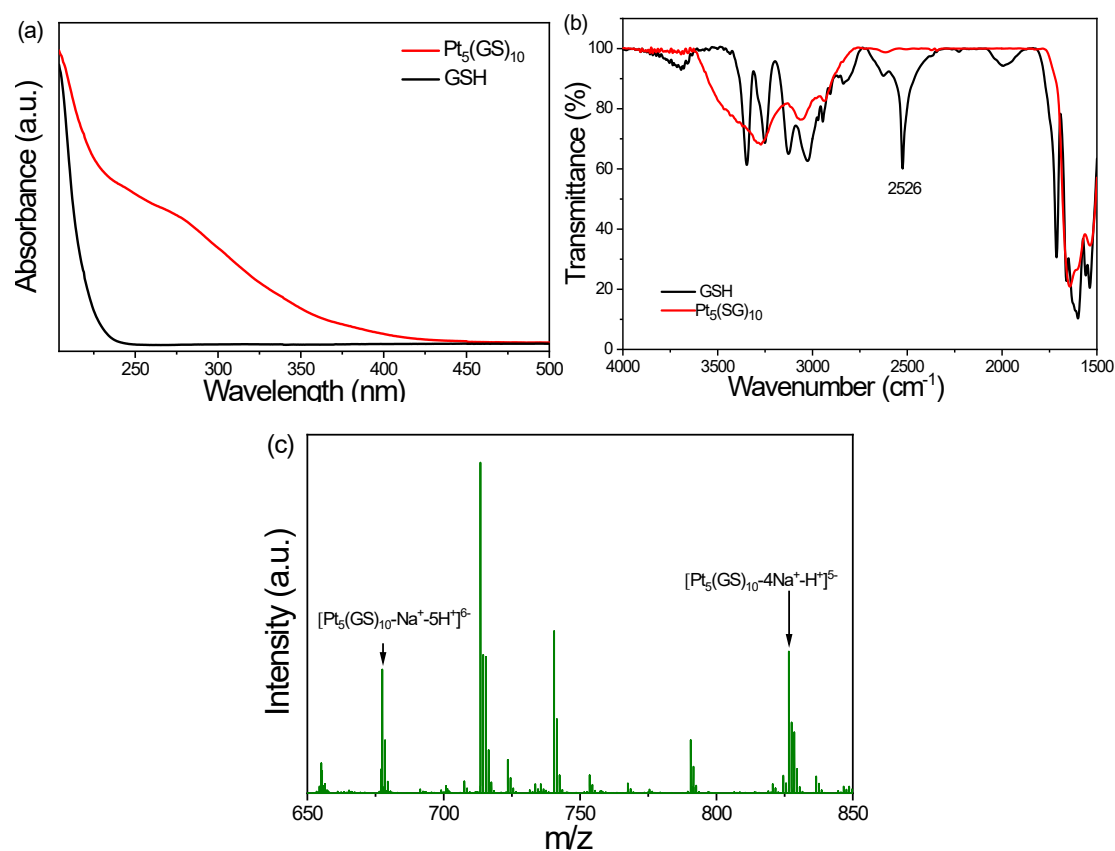

**Figure S1.** (a) UV-Vis absorption and (b) FTIR spectra of the Pt<sub>5</sub>(GS)<sub>10</sub> clusters and pure GSH and (c) ESI-MS profile of the product. The mass spectrum shows that the product consists of Pt<sub>5</sub>(GS)<sub>10</sub>

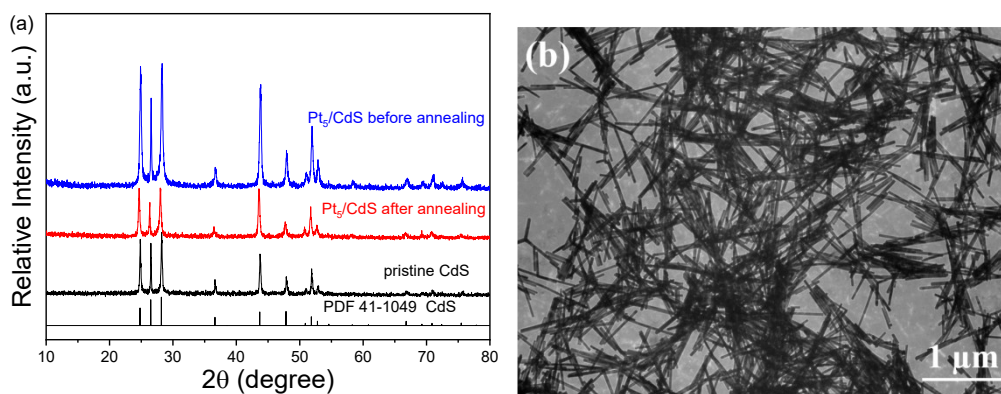

**Figure S2.** (a) XRD patterns of pristine CdS, Pt<sub>5</sub>/CdS before and after annealing; and (b) TEM image of CdS.

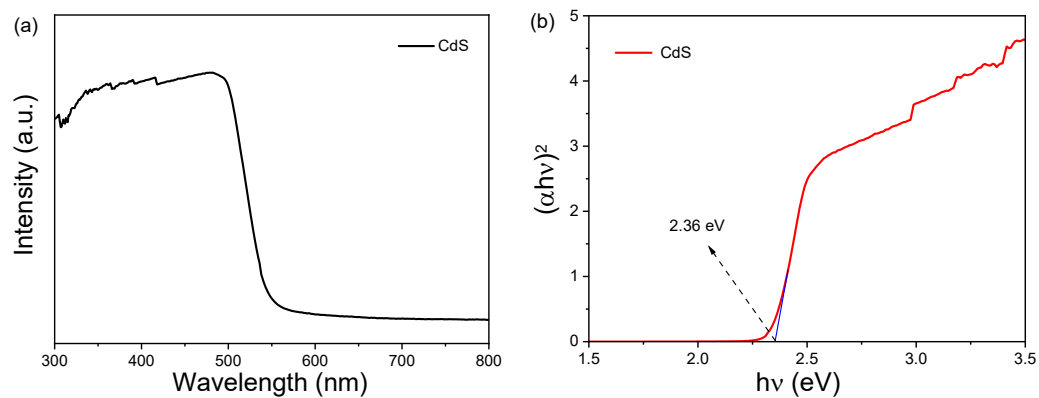

**Figure S3.** (a) UV/Vis diffuse reflection spectrum and (b) the corresponding Tauc plot of CdS.

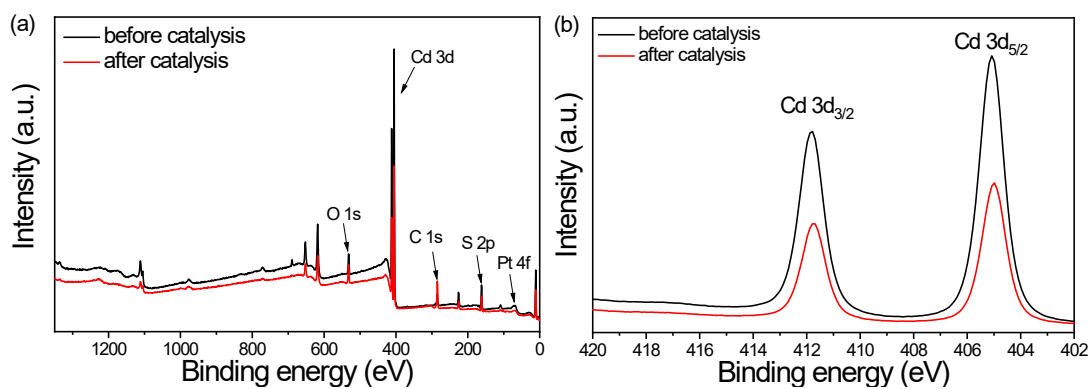

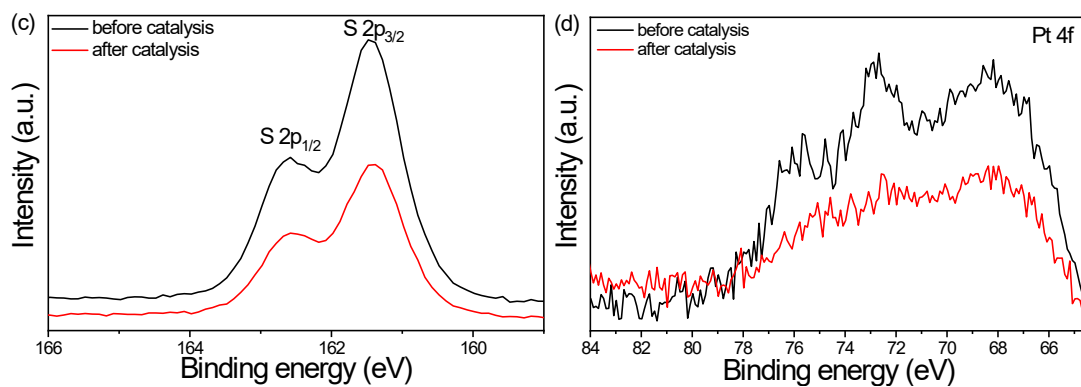

**Figure S4.** XPS analyses of the as-obtained Pt<sub>5</sub>/CdS before and after photocatalysis: (a) survey spectra, (b) Cd 3d, (c) S 2p and (d) Pt 4f.

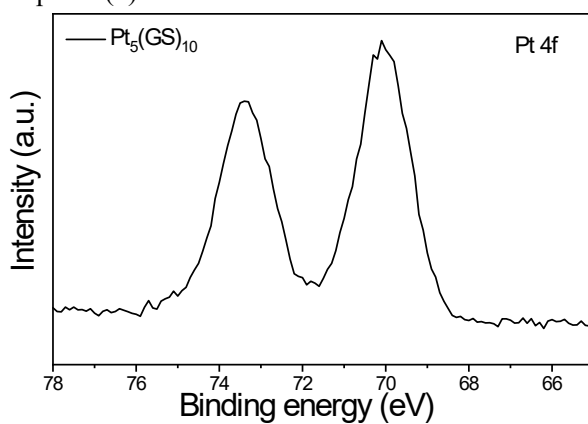

**Figure S5.** Pt 4f XPS spectrum of Pt<sub>5</sub>(GS)<sub>10</sub>.

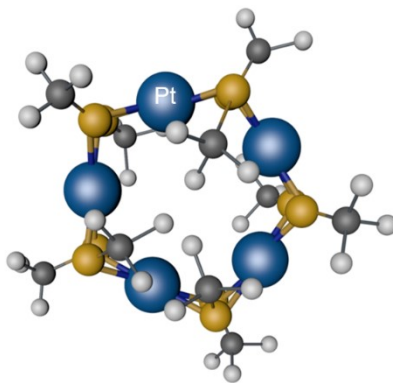

**Figure S6.** The molecular structure of Pt<sub>5</sub>(GS)<sub>10</sub>.

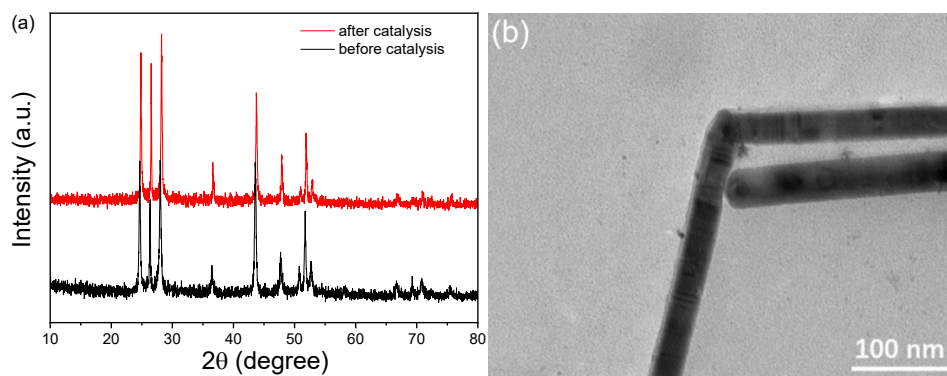



**Figure S7.** (a) XRD pattern and (b) TEM image of the Pt<sub>5</sub>/CdS photocatalyst after durability tests.

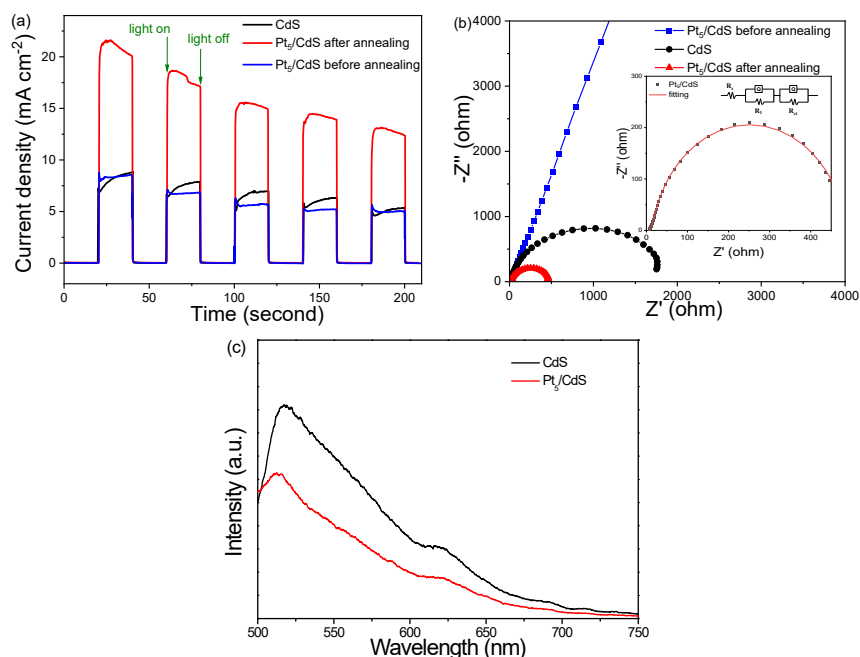

**Figure S8.** (a) The photocurrent responses, (b) Nyquist plots and (c) PL emission spectra of Pt<sub>5</sub>/CdS and CdS.

**Table S1.** Mass percentages of Cd, S and Pt elements in Pt<sub>5</sub>/CdS based on ICP-MS technology.

| Element | Mass percentage /% |
|---------|--------------------|
| Cd      | 68.15              |
| Pt      | 0.10               |
| S       | 10.61              |

**Table S2.** Structural parameters of Pt<sub>5</sub>/CdS extracted from the EXAFS fitting ( $S_0^2 = 0.80$ ).

| Path | CN      | R(Å)     | $\sigma^2(10^{-3}\text{Å}^2)$ | $\Delta E_0(\text{eV})$ | R factor |
|------|---------|----------|-------------------------------|-------------------------|----------|
| Pt-S | 4.0±0.2 | 2.31±0.2 | 4.3±0.4                       | 4.8±0.4                 | 0.02     |

$S_0^2$  is the amplitude reduction factor; CN is the coordination number; R is interatomic distance (the bond length between central atoms and surrounding coordination atoms);  $\sigma^2$  is Debye-Waller factor (a measure of thermal and static disorder in absorber-scatterer distances);  $\Delta E_0$  is edge-energy shift (the difference between the zero kinetic energy value of the sample and that of the theoretical model). R factor is used to value the goodness of the fitting.

**Table S3.** Comparison of photocatalytic H<sub>2</sub> production performances of Pt<sub>5</sub>/CdS with some Pt-based photocatalysts reported in the literatures.

| Catalysts                                           | Reaction Conditions                                                     | Hydrogen generation rate ( $\mu\text{mol h}^{-1} \text{g}^{-1}$ ) | Light Source               | Refs.                                                     |
|-----------------------------------------------------|-------------------------------------------------------------------------|-------------------------------------------------------------------|----------------------------|-----------------------------------------------------------|
| Pt <sub>5</sub> /CdS                                | TEOA                                                                    | 12972                                                             | $\lambda > 400 \text{ nm}$ | <a href="#">This work</a>                                 |
| 0.5% Pt-S doped H-TiO <sub>2</sub>                  | 25%CH <sub>3</sub> OH                                                   | 258                                                               | AM1.5                      | <i>J. Am. Chem. Soc.</i> , <b>2013</b> , 135, 17831.      |
| 1%Pt/TiO <sub>2</sub>                               | 10% CH <sub>3</sub> OH                                                  | 4000                                                              | Xe lamp 200W               | <i>Nat. Commun.</i> <b>2015</b> , 6, 5881.                |
| 0.5 wt% Pt/CdS                                      | 20 vol% lactic acid                                                     | 3650                                                              | $\lambda > 420 \text{ nm}$ | <i>Nano Today</i> . <b>2021</b> 37, 101080.               |
| Al-TCPP-0.1Pt                                       | 5 %TEOA                                                                 | 129                                                               | $\lambda > 380 \text{ nm}$ | <i>Adv. Mater.</i> <b>2018</b> , 30, 1705112.             |
| 4wt%Pt/CdS NSs                                      | NP/Cd Na <sub>2</sub> S(0.35M)/Na <sub>2</sub> SO <sub>3</sub> (0.25 M) | 16800                                                             | $\lambda > 420 \text{ nm}$ | <i>Adv. Energy Mater.</i> <b>2016</b> , 6, 1501241.       |
| Au-Pt-CdS                                           | Na <sub>2</sub> S/Na <sub>2</sub> SO <sub>3</sub>                       | 778                                                               | $\lambda > 420 \text{ nm}$ | <i>Adv. Funct. Mater.</i> <b>2016</b> , 26, 6076-6083.    |
| 2.87%Pt@UiO-66-NH <sub>2</sub>                      | 10 %TEOA                                                                | 257.38                                                            | $\lambda > 380 \text{ nm}$ | <i>Angew. Chem. Int. Ed.</i> <b>2016</b> , 55, 9389.      |
| 0.16%Pt/g-C <sub>3</sub> N <sub>4</sub>             | 10 % TEOA                                                               | 6360                                                              | 300 W Xe lamp              | <i>Adv. Mater.</i> <b>2016</b> , 28, 2427.                |
| 0.6%Pt/TiO <sub>2</sub>                             | 50% CH <sub>3</sub> OH                                                  | 10000                                                             | AM 1.5                     | <i>Science</i> , <b>2011</b> , 331, 746.                  |
| HNMT-Ir/Pt                                          | TEOA                                                                    | 201                                                               | $\lambda > 400 \text{ nm}$ | <i>Angew. Chem. Int. Ed.</i> <b>2018</b> , 57, 3493-3498. |
| 3%Pt/CTF-HUST-2                                     | 10 %TEOA                                                                | 2647                                                              | $\lambda > 420 \text{ nm}$ | <i>Angew. Chem. Int. Ed.</i> <b>2017</b> , 56, 14149.     |
| 1%PtO/TiO <sub>2</sub>                              | CH <sub>3</sub> OH                                                      | 4400                                                              | Xe lamp, 300 W             | <i>Nat. Commun.</i> <b>2015</b> , 6, 5881.                |
| 0.16%Pt/g-C <sub>3</sub> N <sub>4</sub>             | TEOA                                                                    | 6360                                                              | Xe lamp, 300 W             | <i>Adv. Mater.</i> <b>2016</b> , 28, 2427.                |
| TiO <sub>2</sub> /C <sub>3</sub> N <sub>4</sub>     | TEOA, 1wt% Pt                                                           | 770                                                               | AM1.5                      | <i>Appl. Catal. B.</i> <b>2016</b> , 191, 130-137         |
| 1%Pt-Sub-10nm rutile TiO <sub>2</sub> nanoparticles | CH <sub>3</sub> OH                                                      | 1954                                                              | AM1.5                      | <i>Nat. Commun.</i> <b>2015</b> , 6, 5881.                |
| Pt1@CN@CuS                                          | CH <sub>3</sub> OH                                                      | 508.8                                                             | $\lambda > 420 \text{ nm}$ | <i>Angew. Chem. Int. Ed.</i> <b>2020</b> , 59, 2 – 9      |



**Table S4.** The solution resistance ( $R_s$ ), charge transport resistance within the electrode ( $R_{ct}$ ) and charge transfer resistance at the solid/electrolyte interface ( $R_1$ ) of the Pt<sub>5</sub>/CdS /NF electrode.

| $R/\Omega$           | $R_s$ | $R_1$ | $R_{ct}$ |
|----------------------|-------|-------|----------|
| Pt <sub>5</sub> /CdS | 6.64  | 469.8 | 9.30     |

**Table S5.** Kinetic parameters of transient absorption decays of CdS and Pd<sub>5</sub>/CdS under 400-nm excitation.

| <i>Sample</i>        | $\tau_{rise}$ (ps) | $\tau_1$ (ps)    | $\tau_2$ (ps)     | $\tau_3$ (ns)        |
|----------------------|--------------------|------------------|-------------------|----------------------|
| CdS                  | 0.4                | 8 ± 1<br>(29.4%) | 96 ± 5<br>(53.0%) | 1.1 ± 0.2<br>(17.6%) |
| Pd <sub>5</sub> /CdS | 0.1                | 6 ± 1<br>(28.7%) | 45 ± 2<br>(55.6%) | 1.4 ± 0.2<br>(15.7%) |
